# Supplementary material
Source: HighWire-hosted journal article supplement (https://mct.aacrjournals.org/content/suppl/2014/03/20/1535-7163.MCT-13-0446)

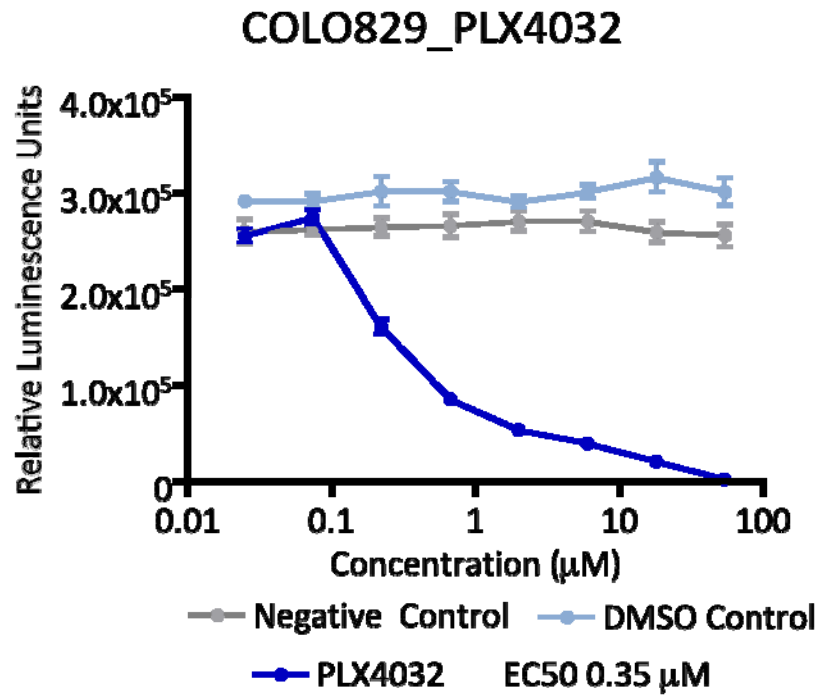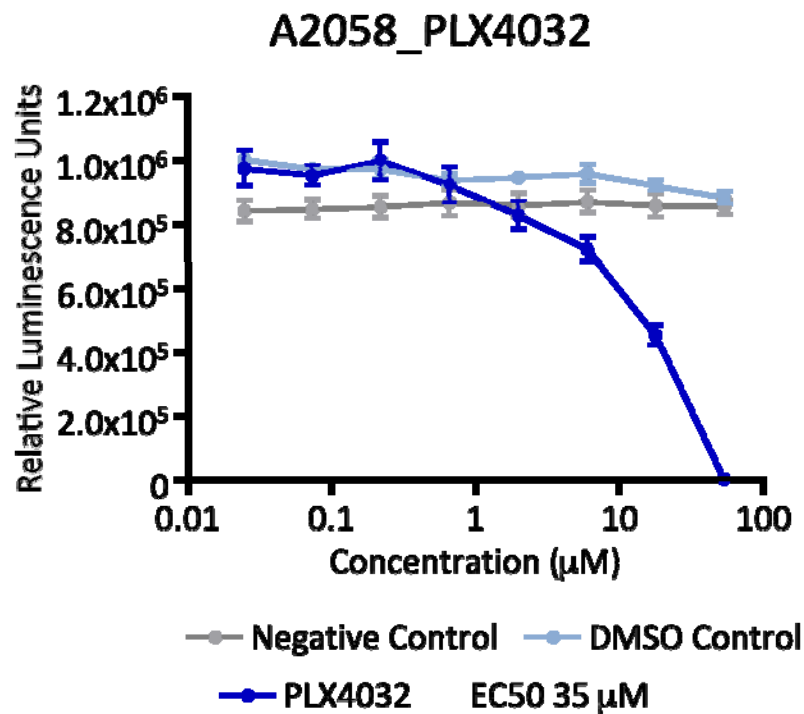

Supplement: Fig4.pdf [file Fig4.pdf]
